# Supplementary material
Source: publisher figshare collection journal article supplement (https://karger.figshare.com/ndownloader/files/16909430)
Supplement: Supplementary file 1 [file 16909430]

**Table S1.** Diagnostic criteria of psoriasis and comorbidities, as defined by the fitness-for service classification numerical codes

| Diagnosis | Diagnostic criteria |
| --- | --- |
| Psoriasis  Contact dermatitis | - Mild: localized skin area involvement, only treated topically - Moderate to severe: with extensive skin area involvement or requires phototherapy or systemic therapy - *Diagnosis requires a consultation with a board-certified dermatologist* - Irritant or allergic contact dermatitis - A characteristic rash after exposure to a suspected substance, with the appropriate location and interval - Supported by positive patch tests for the suspected substance or by clinical improvement after the cessation of that exposure - Diagnosis requires a consultation with a board-certified dermatologist |
| Vitiligo and photosensitive diseases | - Includes polymorphous light eruption, photosensitive eczema, actinic reticuloid, lichen actinicus, vitiligo, albinism, xeroderma pigmentosum - Diagnosis requires a consultation with a board-certified dermatologist |
| Hyperhidrosis | - Diagnosis requires a consultation with a board-certified dermatologist |
| Inflammatory bowel disease | - Chronic or recurrent attacks - Diagnosis requires radiological, endoscopic, or histological diagnosis |
| Irritable bowel syndrome | - Functional disorder of the gastrointestinal tract which complies with known diagnostic criteria - Diagnosis requires a consultation with a board-certified gastroenterologist |
| Arthritis | - Includes rheumatoid arthritis, psoriatic arthritis, reactive arthritis, and juvenile arthritis - Diagnosis requires a consultation with a board-certified rheumatologist |
